# Supplementary material for: The role of naphthalene and its derivatives in the formation of secondary organic aerosol in the Yangtze River Delta region, China
Source: Copernicus journal article supplement (doi:10.5194/acp-24-7467-2024), 2024-07-01
Supplement: Supplementary file 1 [file acp-24-7467-2024-supplement.pdf]

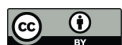

*Supplement of*

## **The role of naphthalene and its derivatives in the formation of secondary organic aerosol in the Yangtze River Delta region, China**

**Fei Ye et al.**

*Correspondence to:* Jingyi Li ([jingyili@nuist.edu.cn](mailto:jingyili@nuist.edu.cn)) and Jianlin Hu ([jianlinhu@nuist.edu.cn](mailto:jianlinhu@nuist.edu.cn))

The copyright of individual parts of the supplement might differ from the article licence.

Contents of this file:

Text S1-S2

Table S1-S4

Figures S1-S12

References

### Text S1. Fitting the SOA formation by one-product and two-product methods

In the CMAQ model, counter species were used to calculate the production of SOA through gas-particle partitioning based on yields ( $\alpha_i$ ) and partitioning coefficients ( $K_{om,i}$ ,  $\text{m}^3 \mu\text{g}^{-1}$ ) of condensable organic products derived from chamber experiment data. The definition of  $K_{om,i}$  followed Pankow (1994) as shown below:

$$K_{om,i} = \frac{1}{C_{sat,i}^*} = \frac{RT}{10^6 \overline{MW}_{om} \xi_i P_{L,i}^0} \quad (1)$$

where  $\overline{MW}_{om}$  ( $\text{g mol}^{-1}$ ) is the average molecular weight of the organic phase,  $\xi_i$  is the activity coefficient of species  $i$  in the absorbing organic phase,  $P_{L,i}^0$  (atm) is the vapor pressure of species  $i$  at temperature  $T$  (K), and  $R$  ( $8.314 \text{ J mol}^{-1} \text{ K}^{-1}$ ) is the gas constant. Factor  $10^6$  is needed for unit conversion. The inverse of the saturation concentration of species  $i$ ,  $C_{sat,i}^*$  ( $\mu\text{g m}^{-3}$ ), is equivalent to  $K_{om,i}$ . The temperature dependence of  $C_{sat,i}^*$  was calculated by the Clausius–Clapeyron equation (Hayes et al., 2015):

$$C_{sat,i}^* = C_{0,i}^* \frac{T_0}{T} \exp \left[ \frac{\Delta H_{vap,i}}{R} \left( \frac{1}{T_0} - \frac{1}{T} \right) \right] \quad (2)$$

where  $C_{0,i}^*$  is the effective saturation concentration of condensable species  $i$  at the reference temperature  $T_0$  (K), typically assumed to be 298 K.  $\Delta H_{vap,i}$  ( $\text{J mol}^{-1}$ ) is the enthalpy of vaporization.

Assuming that the condensable organic products were  $P_1, P_2, \dots, P_n$ , the total SOA yield ( $Y$ ) of a certain parent VOC was calculated as follows (Odum et al., 1996):

$$Y = \sum_i Y_i = M_o \sum_i \frac{\alpha_i K_{om,i}}{1 + M_o K_{om,i}} \quad (3)$$

where  $\alpha_i$  is the mass-based stoichiometric coefficient of semi-volatile product  $i$ .  $M_o$  is the total mass concentration of the absorbing aerosol medium. The SOA formation scheme is named the n-product method based on the total number (n) of  $P_i$ . Accordingly, the total SOA yield of the two-product and one-product methods can be derived as follows:

$$Y = \frac{\alpha_1}{1 + \frac{1}{M_o K_{om,1}}} + \frac{\alpha_2}{1 + \frac{1}{M_o K_{om,2}}} \quad (4)$$

$$Y = \frac{\alpha_1}{1 + \frac{1}{M_o K_{om,1}}} \quad (5)$$

### **Text S2. Estimation of Nap and MN emissions**

To obtain the detailed emissions of 1-MN and 2-MN, the ratios of 1-MN/2MN to non-methane volatile organic compounds (NMVOCs) of different sources were calculated as follows:

$$p = \sum_{j=1}^n (a_j * W_j) \quad (6)$$

where  $p$  is the mass proportion of 1-MN/2-MN to total NMVOC emissions in a major source,  $a_j$  is the mass ratio of 1-MN/2-MN to NMVOCs in a subcategorized source  $j$ , and  $W_j$  is the weight percent of the total emitted NMVOCs from a subcategorized source  $j$  to that of the major source. For a specific source  $j$ ,  $a_j$  was obtained from the U.S. Environmental Protection Agency's (EPA's) repository of organic gas and particulate matter (PM) speciation profiles of air pollution sources (SPECIATEv5.2), and  $W_j$  was based on the information reported by An et al. (2021) for the YRD and Li et al. (2014) for other regions, respectively.

**Table S1.** The yield ( $\alpha$ ), equilibrium partitioning coefficient ( $K_{om}$ ), and enthalpy of SOA precursors from Nap, 1-MN, and 2-MN in different scenarios.

|                                       | Species | $\alpha_1$ | $K_{om,1}$ (m <sup>3</sup><br>$\mu\text{g}^{-1}$ ) | $\alpha_2$ | $K_{om,2}$ (m <sup>3</sup><br>$\mu\text{g}^{-1}$ ) | Enthalpy (kJ<br>mol <sup>-1</sup> ) | References for $\alpha$ and $K_{om}$ |
|---------------------------------------|---------|------------|----------------------------------------------------|------------|----------------------------------------------------|-------------------------------------|--------------------------------------|
| High NO <sub>x</sub><br>(one-product) | Nap     | 0.210      | 0.602                                              | 1.07       | 3.77E-3                                            | 18                                  | CMAQ                                 |
|                                       | 1-MN    | 0.500      | 0.110                                              | -          | -                                                  | 16.6                                | Chan et al. (2009)                   |
|                                       | 2-MN    | 0.550      | 0.130                                              | -          | -                                                  | 17.5                                | Chan et al. (2009)                   |
| High NO <sub>x</sub><br>(two-product) | Nap     | 0.210      | 0.602                                              | 1.07       | 3.77E-3                                            | 18                                  | CMAQ                                 |
|                                       | 1-MN    | 0.206      | 0.193                                              | 0.107      | 0.001                                              | 16.6                                | Shakya and Griffin (2010)            |
|                                       | 2-MN    | 0.247      | 0.193                                              | 0.0920     | 0.001                                              | 17.5                                | Shakya and Griffin (2010)            |
| Low NO <sub>x</sub>                   | Nap     | 0.730      | <sup>a</sup>                                       |            |                                                    |                                     | CMAQ                                 |
|                                       | 1-MN    | 0.680      | <sup>a</sup>                                       |            |                                                    |                                     | Chan et al. (2009)                   |
|                                       | 2-MN    | 0.580      | <sup>a</sup>                                       |            |                                                    |                                     | Chan et al. (2009)                   |

<sup>a</sup> Constant yield

**Table S2.** Sector-based mass ratios of Nap, 1-MN, and 2-MN to NMVOC emissions in the emis-orig case.

| Emission region            | Species |                                  |                |          | industrial  | residential | wildfire <sup>c</sup> |
|----------------------------|---------|----------------------------------|----------------|----------|-------------|-------------|-----------------------|
|                            |         | residential                      | road transport | industry | solvent use | solvent use |                       |
| YRD region <sup>a</sup>    | Nap     | The original Nap emission in YRD |                |          |             |             | 0.391                 |
|                            | 1-MN    | 0.0739                           | 0.0143         | 2.62E-3  | 5.47E-4     | 0.0115      | 0.134                 |
|                            | 2-MN    | 0.0899                           | 0.0232         | 0.0116   | 2.38E-3     | 0.0500      | 0.170                 |
| Other regions <sup>b</sup> | Species | residential                      | transportation | industry | power       | agriculture | wildfire <sup>c</sup> |
|                            | Nap     | 0.0252                           | 0.0317         | 0.0983   | -           | -           | 0.391                 |
|                            | 1-MN    | 3.95E-3                          | 4.38E-3        | 1.67E-4  | -           | -           | 0.134                 |
|                            | 2-MN    | 0.0108                           | 7.24E-3        | 1.11E-3  | -           | -           | 0.170                 |

<sup>a</sup> The YRD inventory was used for the YRD region and was divided into 13 sources (ship, nonroad transport, road transport, industry, industrial solvent use, residential solvent use, agriculture, residential, industry boiler and kiln, power, dust, oil storage and transportation, gasoline vehicle evaporative emissions), among which only sources with none zero mass ratios of Nap and MN were listed in the Table. <sup>b</sup> The MEIC inventory was used for other regions and was divided into 5 sources.

<sup>c</sup> The ratios of Nap and MN for wildfire emissions in the YRD region were the same as in other regions.

**Table S3.** Model performances of MDA8 O<sub>3</sub> and daily average PM<sub>2.5</sub>, SO<sub>2</sub>, NO<sub>2</sub>, and CO in several cities listed in Fig. S1 in case-1 product. OBS and PRE represent observed and predicted concentrations, respectively. The benchmarks follow Emery et al. (2017). Performances that exceed the benchmark are represented in bold font.

| Species                                    | Metrics | Suzhou      | Nanjing | Hangzhou | Hefei | Shanghai     | Benchmark |
|--------------------------------------------|---------|-------------|---------|----------|-------|--------------|-----------|
| MDA8                                       | OBS     | 68.37       | 75.22   | 70.74    | 71.29 | 65.85        |           |
| O <sub>3</sub> (ppb)                       | PRE     | 71.54       | 71.93   | 73.49    | 68.49 | 47.50        |           |
|                                            | NMB     | 0.05        | -0.04   | 0.04     | -0.04 | <b>-0.28</b> | <±0.15    |
|                                            | NME     | <b>0.25</b> | 0.17    | 0.22     | 0.23  | <b>0.33</b>  | <0.25     |
|                                            | r       | 0.40        | 0.73    | 0.62     | 0.56  | 0.25         |           |
| PM <sub>2.5</sub><br>(µg m <sup>-3</sup> ) | OBS     | 42.16       | 38.41   | 37.65    | 46.54 | 42.04        |           |
|                                            | PRE     | 31.83       | 36.79   | 31.91    | 48.53 | 23.98        |           |
|                                            | NMB     | -0.24       | -0.04   | -0.15    | 0.04  | <b>-0.43</b> | <±0.30    |
|                                            | NME     | 0.33        | 0.26    | 0.39     | 0.32  | 0.47         | <0.50     |
| SO <sub>2</sub><br>(ppb)                   | OBS     | 2.33        | 3.42    | 3.03     | 2.50  | 3.80         |           |
|                                            | PRE     | 2.51        | 3.55    | 2.36     | 2.70  | 1.76         |           |
|                                            | NMB     | 0.08        | 0.04    | -0.22    | 0.08  | -0.54        |           |
|                                            | NME     | 0.35        | 0.20    | 0.24     | 0.36  | 0.54         |           |
|                                            | r       | 0.49        | 0.70    | 0.64     | 0.50  | 0.44         |           |
|                                            | OBS     | 18.77       | 17.84   | 18.54    | 19.80 | 17.34        |           |

---

|                 |     |        |        |        |        |        |
|-----------------|-----|--------|--------|--------|--------|--------|
| NO <sub>2</sub> | PRE | 12.56  | 13.84  | 10.92  | 15.03  | 17.57  |
| (ppb)           | NMB | -0.33  | -0.22  | -0.41  | -0.24  | 0.01   |
|                 | NME | 0.34   | 0.24   | 0.41   | 0.25   | 0.18   |
|                 | r   | 0.49   | 0.67   | 0.33   | 0.83   | 0.83   |
| CO              | OBS | 549.52 | 590.07 | 673.79 | 644.89 | 495.34 |
| (ppb)           | PRE | 471.97 | 611.71 | 483.33 | 507.04 | 307.43 |
|                 | NMB | -0.14  | 0.04   | -0.28  | -0.21  | -0.38  |
|                 | NME | 0.26   | 0.17   | 0.30   | 0.25   | 0.39   |
|                 | r   | 0.73   | 0.68   | 0.36   | 0.50   | 0.78   |

---



**Table S4.** Model performances of daily ARO1, ARO2MN', BENZ, NO<sub>2</sub>, and NO at the Taizhou site in case-1 product. The units of OBS (observation) and PRE (prediction) are ppb.

|     | ARO1  | ARO2MN' | BENZ | NO <sub>2</sub> | NO    |
|-----|-------|---------|------|-----------------|-------|
| OBS | 0.05  | 0.37    | 0.52 | 9.13            | 1.42  |
| PRE | 0.71  | 0.45    | 0.61 | 7.25            | 0.96  |
| NMB | 13.20 | 0.23    | 0.19 | -0.21           | -0.32 |
| NME | 13.20 | 0.36    | 0.37 | 0.27            | 0.62  |
| r   | 0.80  | 0.77    | 0.75 | 0.79            | 0.16  |

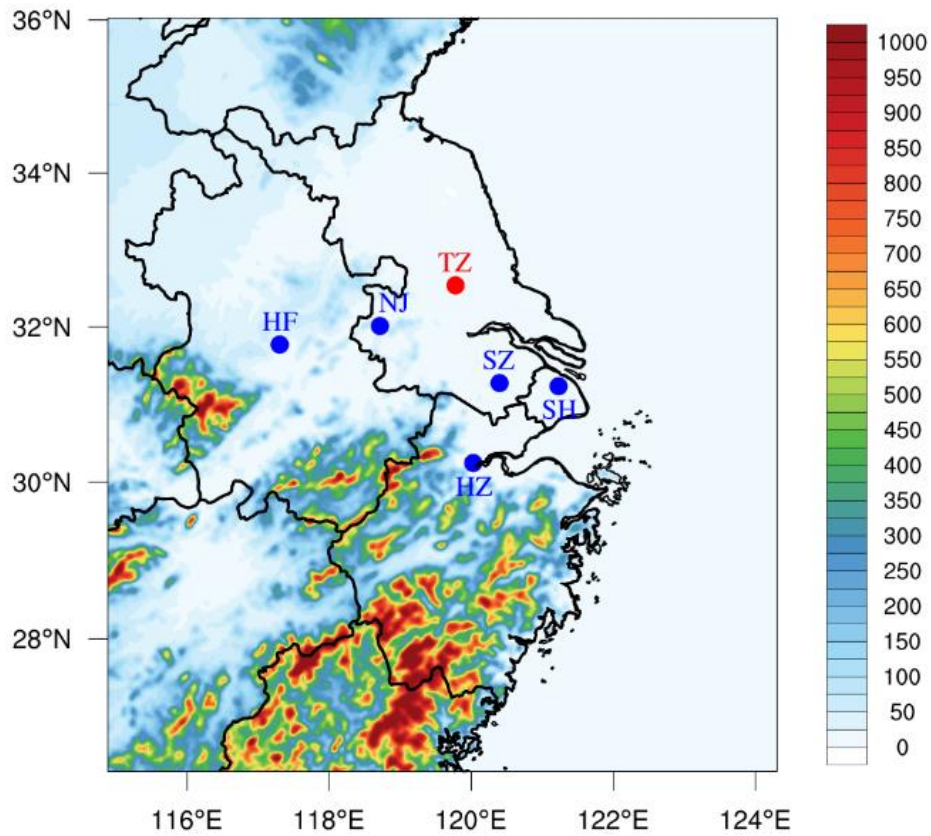

**Figure S1.** The modeling domain and locations of Taizhou city (red dot) and other sites (Hefei, Nanjing, Suzhou, Shanghai, and Hangzhou; blue dots) for model performance evaluation. The color bar represents the topography height (in meters).

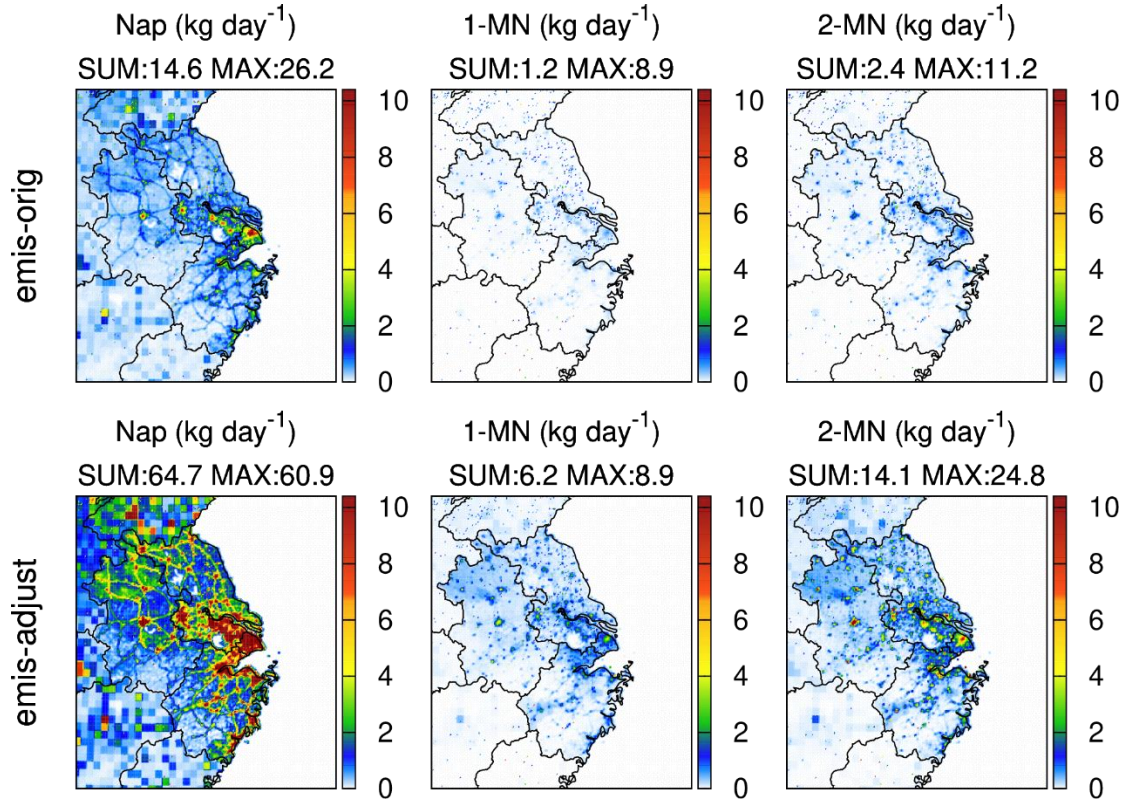

**Figure S2.** Regional distributions of Nap, 1-MN, and 2-MN emissions in emis-orig and emis-adjust. SUM represents the total emission rate (tons day<sup>-1</sup>) over the YRD region.

MAX represents the maximum emission rate (kg day<sup>-1</sup>) in the grids of the YRD.

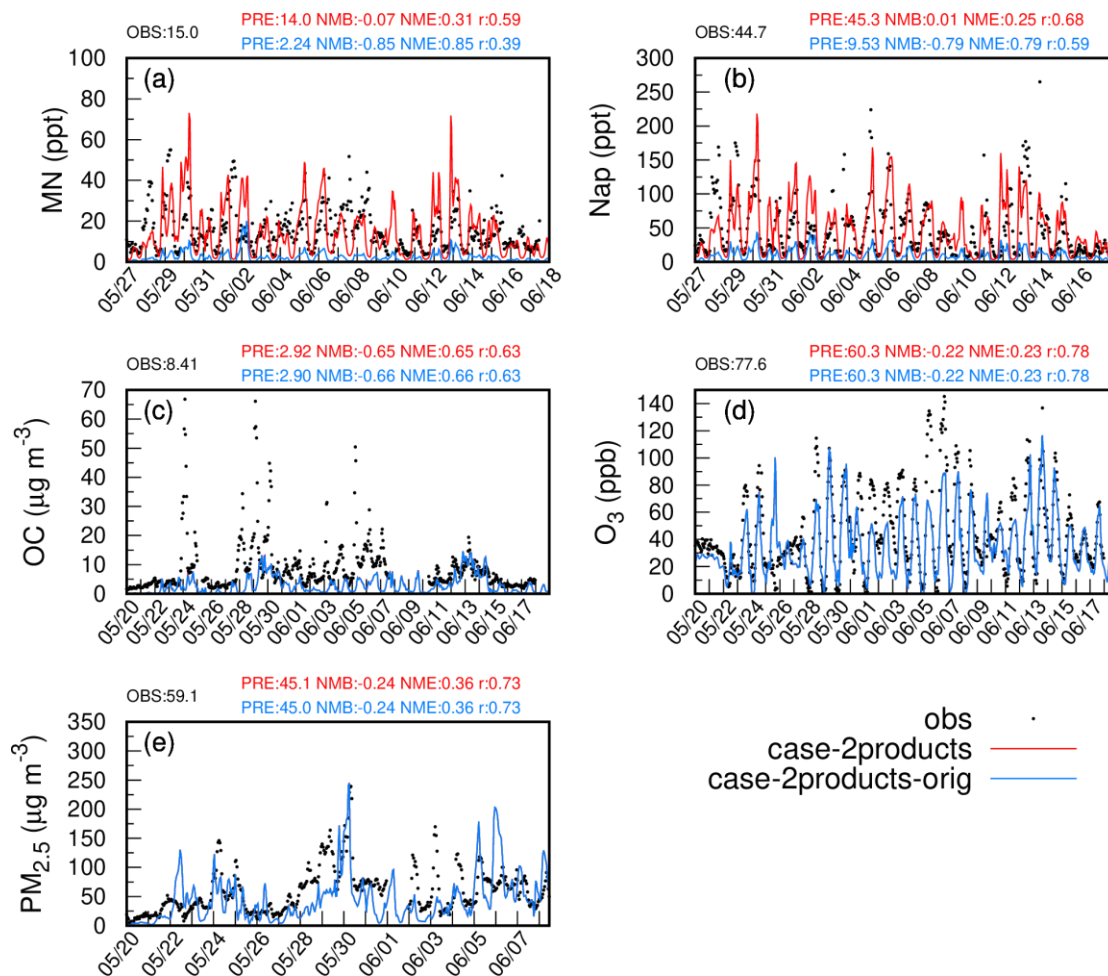

**Figure S3.** Observed and simulated hourly concentrations of MN, Nap, OC, PM<sub>2.5</sub>, and O<sub>3</sub> based on emis-adjust (red) and emis-orig (blue) at the Taizhou site. Model performances for daily MN, Nap, OC, PM<sub>2.5</sub>, and MDA8 O<sub>3</sub> are shown in blue for case-2products-orig and in red for case-2products. OBS and PRE represent the average of observations and predictions, respectively. Note that the red and blue lines overlap in (c)-(e).

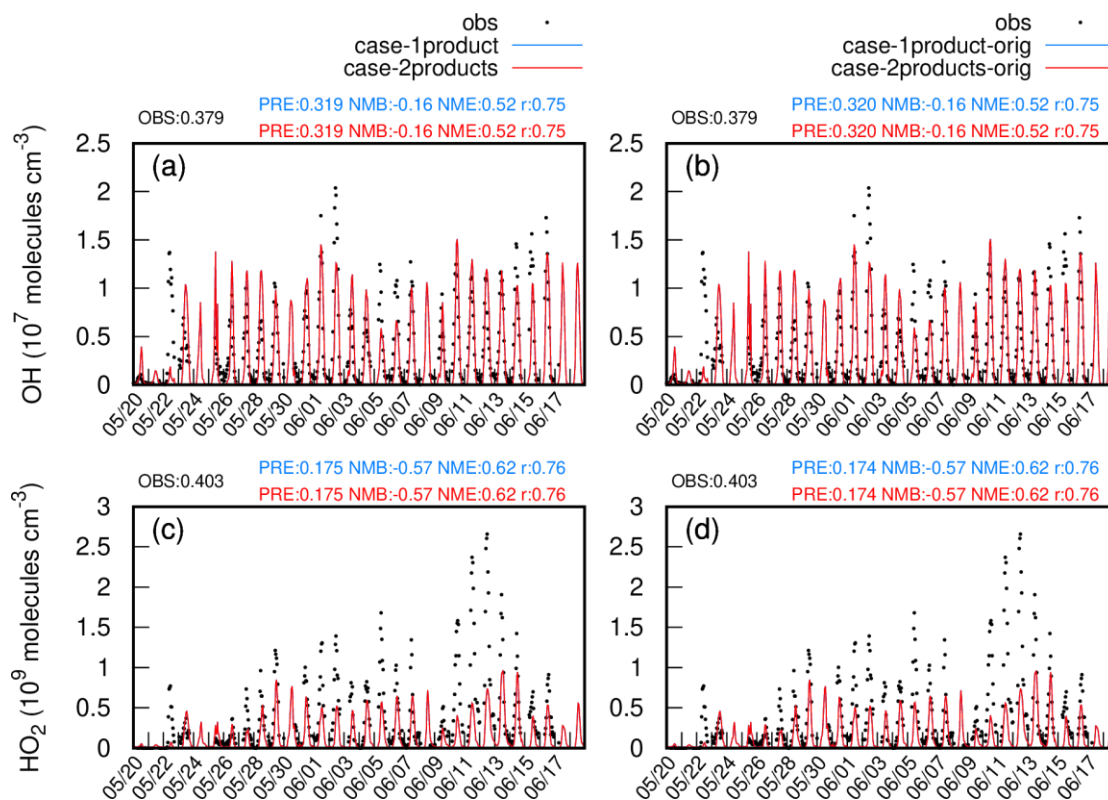

**Figure S4.** Observed and predicted temporal variations of OH and HO<sub>2</sub> radicals based on emis-adjust (left column) and emis-orig (right column) at the Taizhou site. Model performances for OH and HO<sub>2</sub> radicals are shown in blue for case-1product or case-1product-orig and in red for case-2products or case-2products-orig when compared with the observations from the EXPLORE-YRD campaign. OBS and PRE represent the average of observations and predictions, respectively. Note that the red and blue lines overlap.

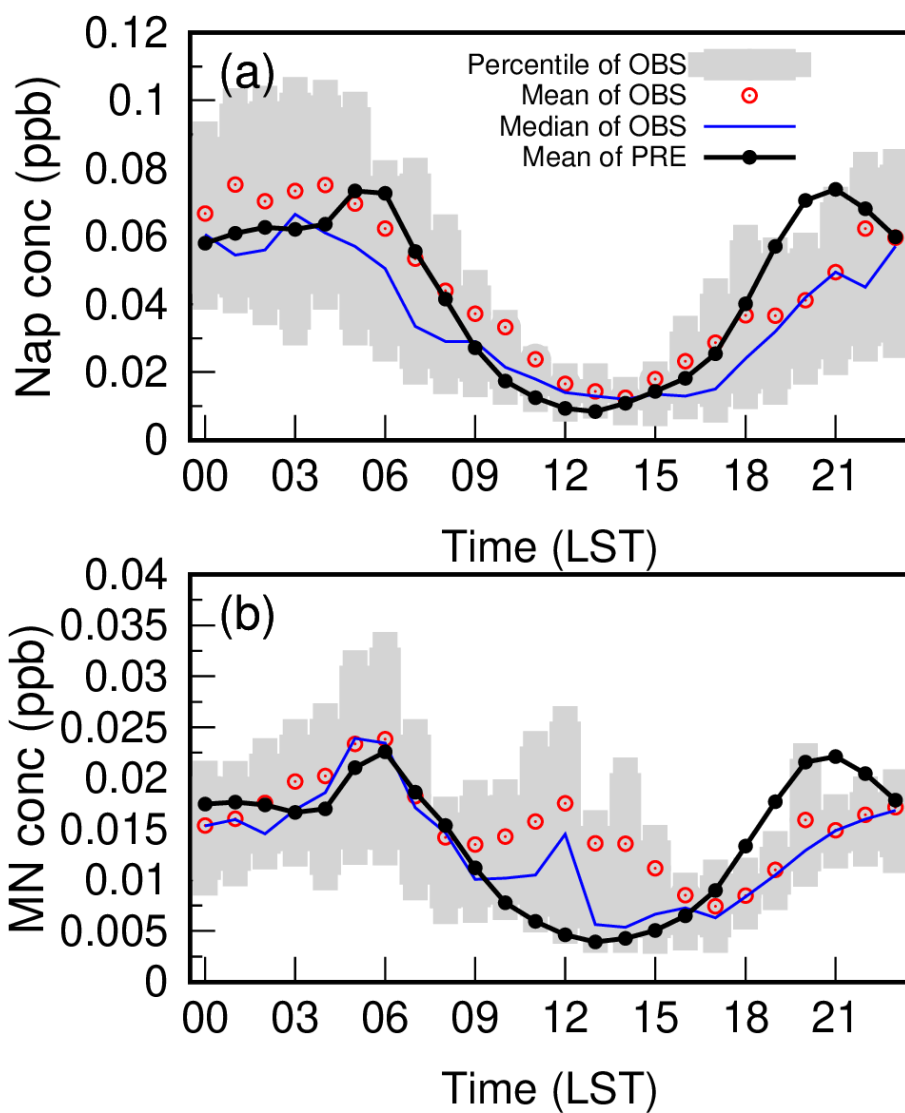

**Figure S5.** Observed (OBS) and predicted (PRE) diurnal variations of (a) Nap and (b) MN at the Taizhou site. The gray shadow represents the range between the 25th and 75th percentiles of observed concentration.

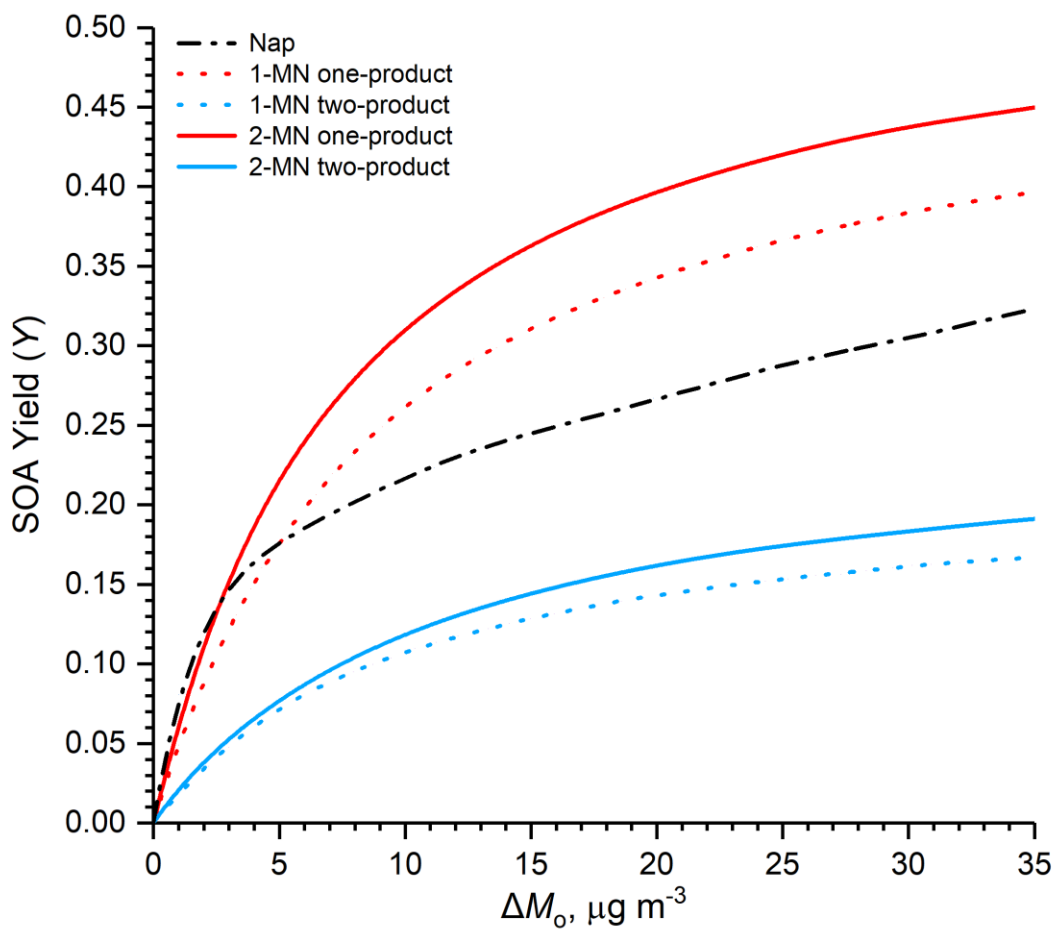

**Figure S6.** Comparison of fitted SOA yield curves of Nap, 1-MN, and 2-MN under high-NO<sub>x</sub> conditions with different total organic mass concentrations ( $\Delta M_o$ ). SOA yield ( $Y$ ) is calculated as  $Y = \Delta M_o \sum_i \frac{\alpha_i K_{om,i}}{1 + \Delta M_o K_{om,i}}$ , where values of  $\alpha$  and  $K_{om}$  come from Table S1.

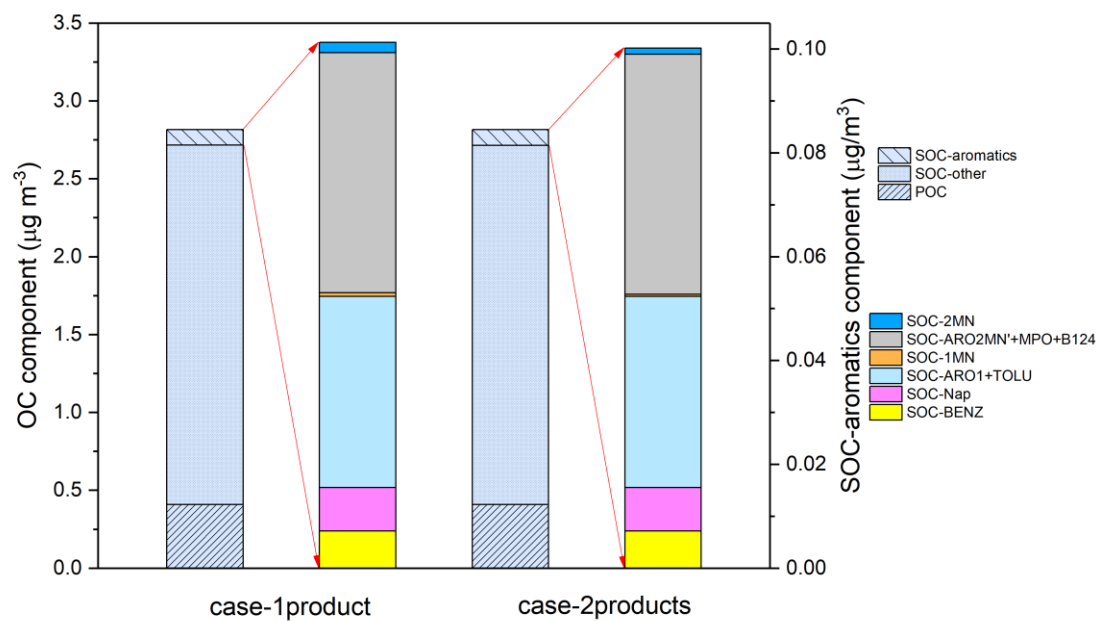

**Figure S7.** Episode-averaged composition of OC and SOC derived from aromatics in case-1product and case-2products. SOC-aromatics represents the SOC generated by all the aromatic precursors. SOC-other represents SOC minus SOC-aromatics.



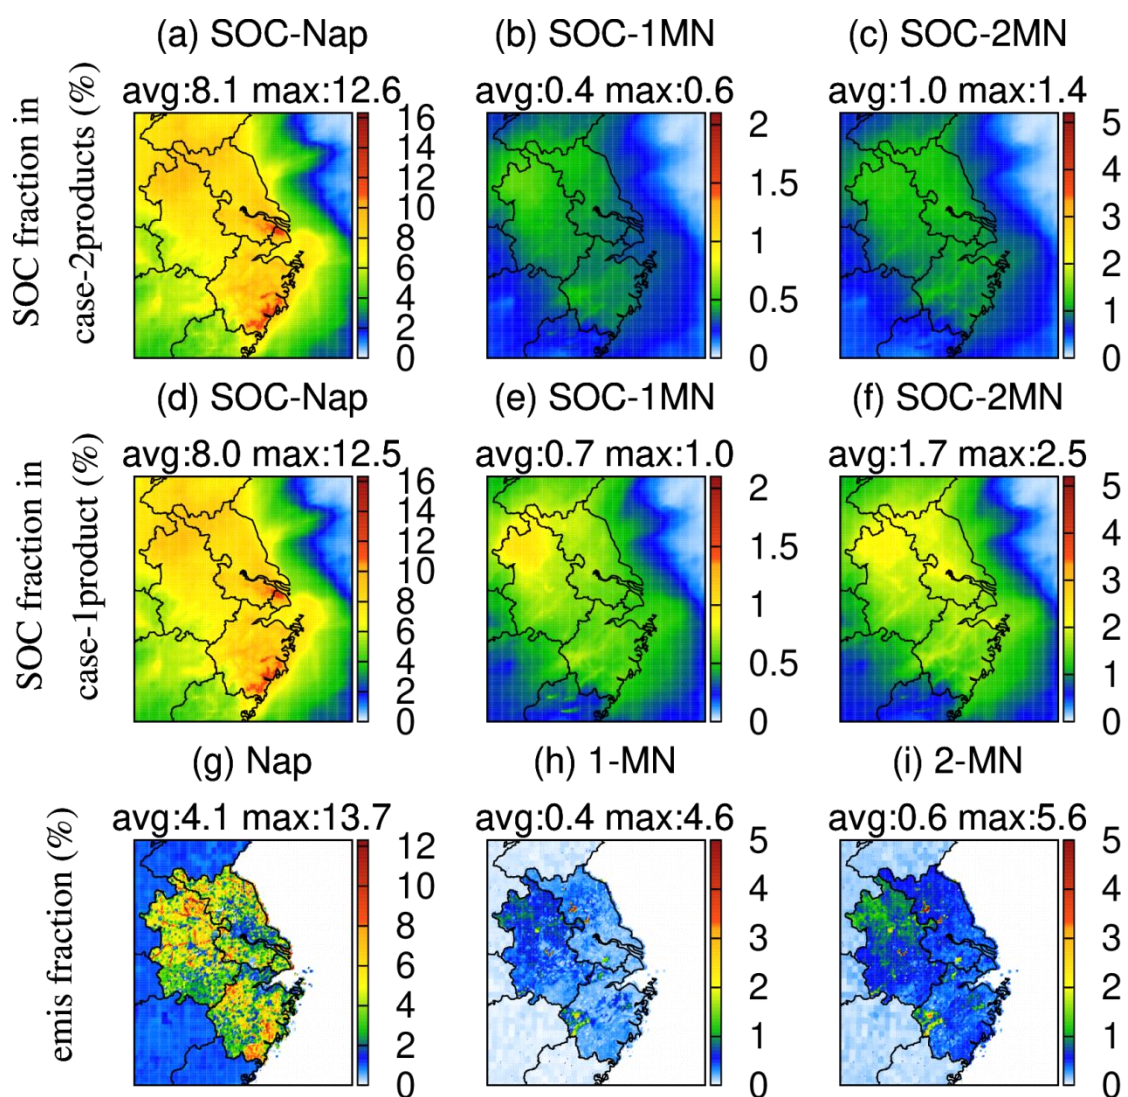

**Figure S8.** Contributions of Nap, 1-MN, and 2-MN to aromatic-derived SOC in the case-2products (a–c) and the case-1product (d–f) and to the total aromatic emissions (g–i).

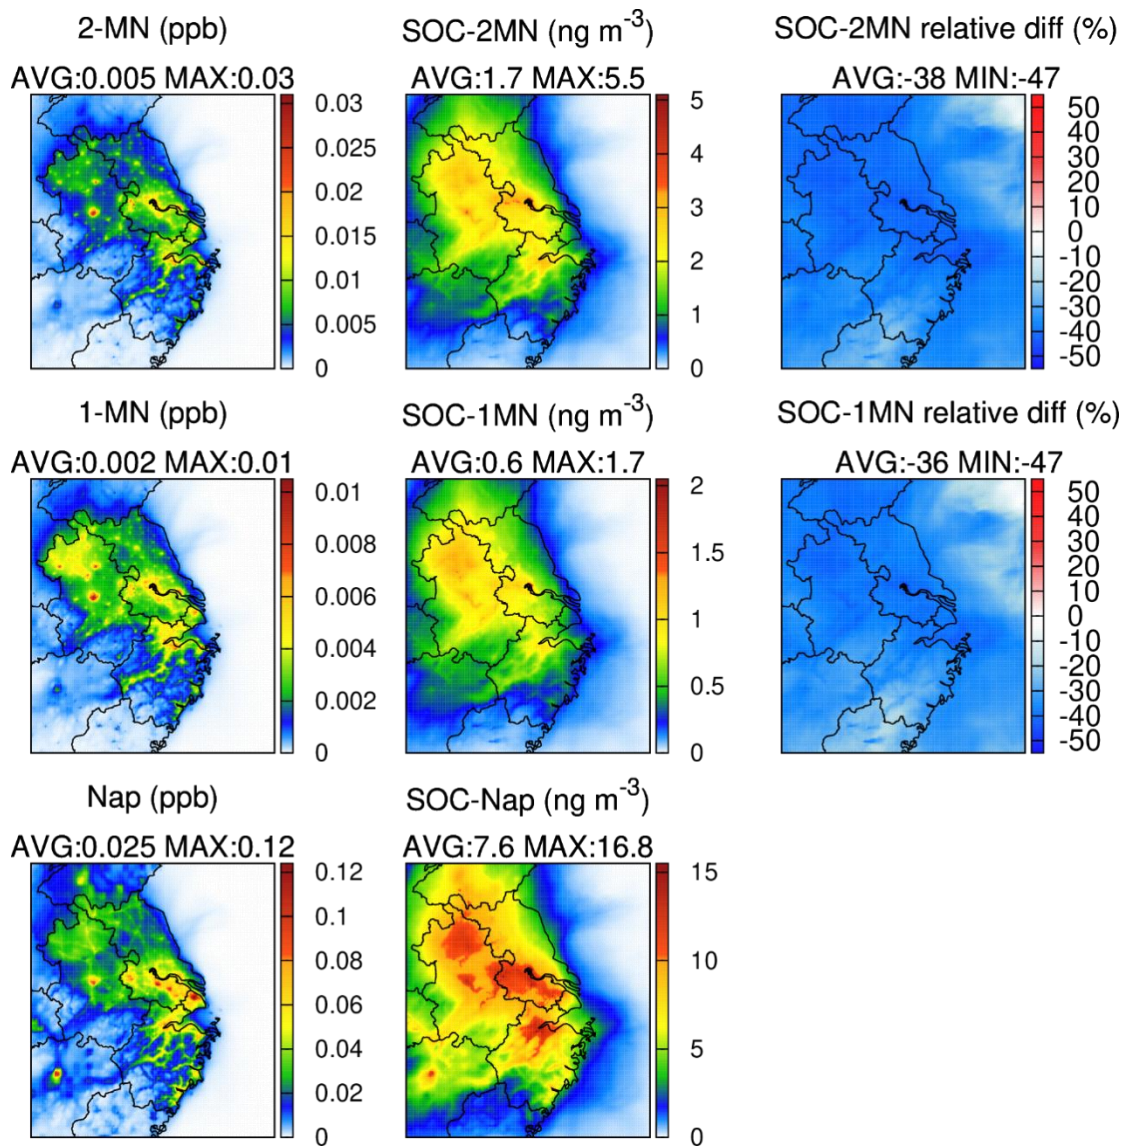

**Figure S9.** Episode-averaged concentrations of Nap, 1-MN, and 2-MN in case-1product (first column), concentrations of SOC-Nap, SOC-1MN, and SOC-2MN in case-1product (second column), and relative differences in SOC-1MN and SOC-2MN between case-2products and case-1product calculated as  $(\text{case-2products} - \text{case-1product}) / \text{case-1product} \times 100 \%$  (third column).

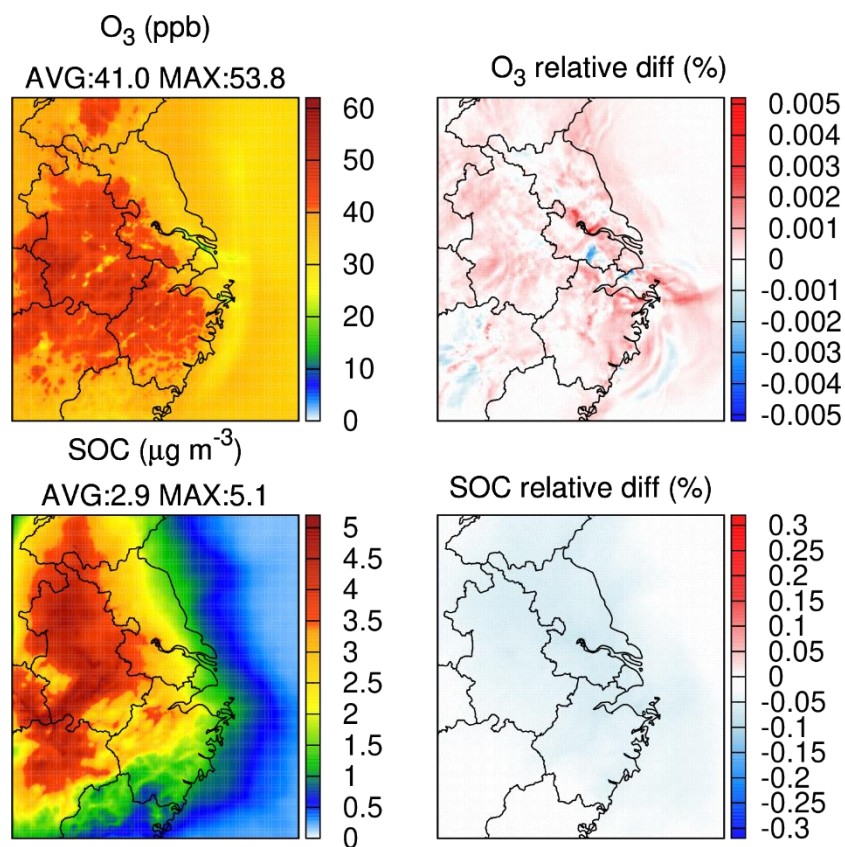

**Figure S10.** Episode-averaged concentrations of SOC and  $O_3$  in case-1product (left column) and the changes in  $O_3$  and SOC in case-2products relative to case-1product (right column).

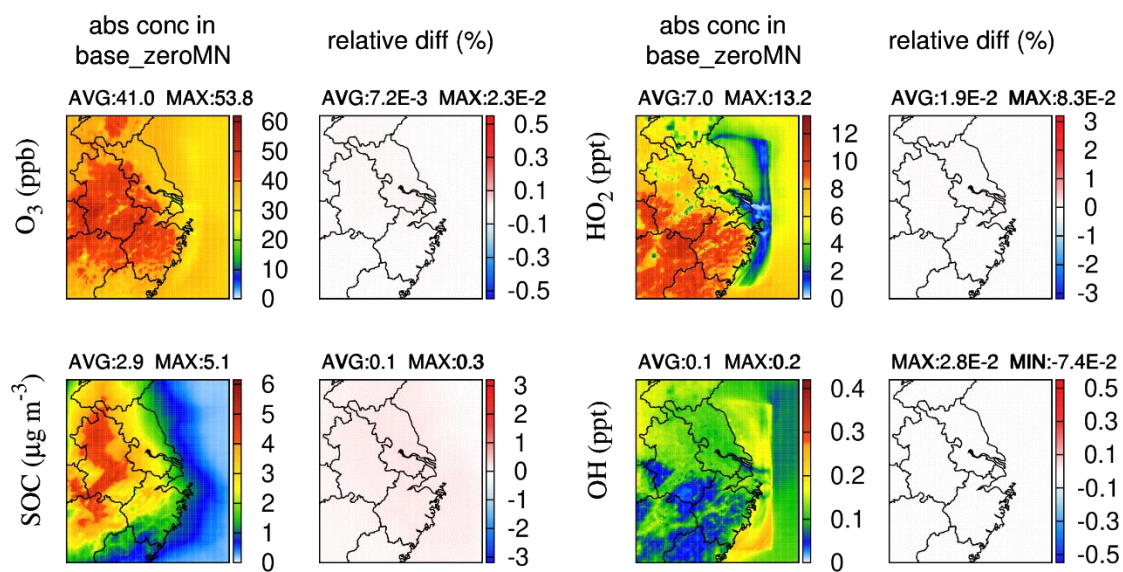

**Figure S11.** Average concentrations of SOC,  $O_3$ ,  $OH^\bullet$ , and  $HO_2^\bullet$  in base\_zeroMN and changes in case-1product relative to base\_zeroMN.

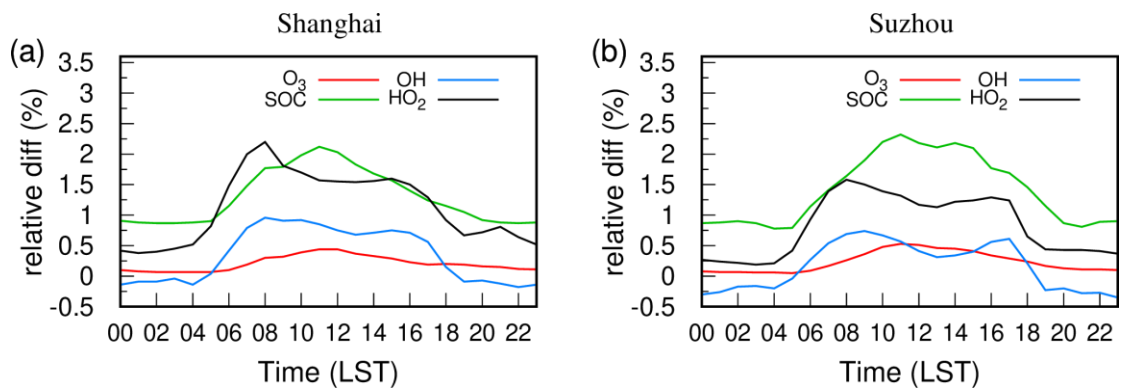

**Figure S12.** Diurnal relative changes in case-1 product compared to base\_zeroNapMN in (a) Shanghai and (b) Suzhou.

## References

- An, J., Huang, Y., Huang, C., Wang, X., Yan, R., Wang, Q., Wang, H., Jing, S. a., Zhang, Y., Liu, Y., Chen, Y., Xu, C., Qiao, L., Zhou, M., Zhu, S., Hu, Q., Lu, J., and Chen, C.: Emission inventory of air pollutants and chemical speciation for specific anthropogenic sources based on local measurements in the Yangtze River Delta region, China, *Atmospheric Chemistry and Physics*, 21, 2003-2025, 10.5194/acp-21-2003-2021, 2021.
- Chan, A. W. H., Kautzman, K. E., Chhabra, P. S., Surratt, J. D., Chan, M. N., Crounse, J. D., Kürten, A., Wennberg, P. O., Flagan, R. C., and Seinfeld, J. H.: Secondary organic aerosol formation from photooxidation of naphthalene and alkylnaphthalenes: implications for oxidation of intermediate volatility organic compounds (IVOCs), *Atmospheric Chemistry and Physics*, 9, 3049-3060, 10.5194/acp-9-3049-2009, 2009.
- Emery, C., Liu, Z., Russell, A. G., Odman, M. T., Yarwood, G., and Kumar, N.: Recommendations on statistics and benchmarks to assess photochemical model performance, *Journal of the Air & Waste Management Association*, 67, 582-598, 10.1080/10962247.2016.1265027, 2017.
- Hayes, P. L., Carlton, A. G., Baker, K. R., Ahmadov, R., Washenfelder, R. A., Alvarez, S., Rappenglück, B., Gilman, J. B., Kuster, W. C., de Gouw, J. A., Zotter, P., Prévôt, A. S. H., Szidat, S., Kleindienst, T. E., Offenberg, J. H., Ma, P. K., and Jimenez, J. L.: Modeling the formation and aging of secondary organic aerosols in Los Angeles during CalNex 2010, *Atmospheric Chemistry and Physics*, 15, 5773-5801, 10.5194/acp-15-5773-2015, 2015.
- Li, M., Zhang, Q., Streets, D. G., He, K. B., Cheng, Y. F., Emmons, L. K., Huo, H., Kang, S. C., Lu, Z., Shao, M., Su, H., Yu, X., and Zhang, Y.: Mapping Asian anthropogenic emissions of non-methane volatile organic compounds to multiple chemical mechanisms, *Atmospheric Chemistry and Physics*, 14, 5617-5638, 10.5194/acp-14-5617-2014, 2014.
- Odum, J. R., Hoffmann, T., Bowman, F., Collins, D., Flagan, R. C., and Seinfeld, J. H.: Gas/Particle Partitioning and Secondary Organic Aerosol Yields, *Environmental Science & Technology*, 30, 2580-2585, 10.1021/es950943+, 1996.
- Pankow, J. F.: An absorption model of gas/particle partitioning of organic compounds in the atmosphere, *Atmospheric Environment*, 28, 185-188, [https://doi.org/10.1016/1352-2310\(94\)90093-0](https://doi.org/10.1016/1352-2310(94)90093-0), 1994.
- Shakya, K. M. and Griffin, R. J.: Secondary Organic Aerosol from Photooxidation of Polycyclic Aromatic Hydrocarbons, *Environmental Science & Technology*, 44, 8134-8139, 10.1021/es1019417, 2010.
